# Supplementary material for: Genomic Analysis Confirms Population Structure and Identifies Inter-Lineage Hybrids in Aegilops tauschii
Source: Front Plant Sci. 2019 Jan 25;10:9. doi: 10.3389/fpls.2019.00009 (PMC6357674; doi:10.3389/fpls.2019.00009)
Supplement: Supplementary file 2 [file Table_1.XLSX]

## Sheet: Sheet1
Table S1. List of Ae. tauschii accessions and wheat lines with associated metadata.
S.No.	TA	Collection	passport	passport_abb	province	lineage	latitude	longitude	altitude (m)
1	TA10069	Old collection	Afghanistan	AFG	Kabul	1	34.5	69.1667	1840
2	TA10070	Old collection	Afghanistan	AFG	Kabul	1	34.5	69.1667	1840
3	TA10071	Old collection	Afghanistan	AFG	Unknown	1	36	68.8333	1850
4	TA10072	Old collection	Afghanistan	AFG	Baghlan	1	35.9563	68.7123	640
5	TA10073	Old collection	Afghanistan	AFG	Baghlan	1	35.9563	68.7123	670
6	TA10074	Old collection	Afghanistan	AFG	Baghlan	1	35.9563	68.7123	670
7	TA10075	Old collection	Afghanistan	AFG	Baghlan	1	35.9563	68.7123	670
8	TA10076	Old collection	Afghanistan	AFG	Balkh (Sar-e Pol)	1	36	66.55	760
9	TA10077	Old collection	Pakistan	PAK	North West Frontier	1	35.6833	71.76	1460
10	TA10078	Old collection	Pakistan	PAK	North West Frontier	1	35.66	71.77	1480
11	TA10079	Old collection	Armenia	ARM	Yerevan	1	40.1631	44.4706	1000
12	TA10080	Old collection	Armenia	ARM	Vayots Dzor	1	39.6841	45.2329	1200
13	TA10082	Old collection	Azerbaijan	AZB	Shaki-Zaqatala/Shaki	1	40.9837	47.1226	315
14	TA10084	Old collection	Azerbaijan	AZB	Aran/Beylagan	1	39.5655	47.6353	105
15	TA10088	Old collection	Azerbaijan	AZB	Absheron/Baki	1	40.435	49.8676	70
16	TA10096	Old collection	Armenia	ARM	Unknown	1	40.335	44.2648	NA
17	TA10097	Old collection	Armenia	ARM	Vayots Dzor	1	39.7333	45.3167	2025
18	TA10099	Old collection	Armenia	ARM	Yerevan	1	40.1397	44.5278	995
19	TA10100	Old collection	Armenia	ARM	Kotayk	1	40.1154	44.739	1415
20	TA10102	Old collection	Georgia	GEO	Kvemo Kartli	1	41.4746	44.8036	400
21	TA10105	Old collection	Georgia	GEO	Kakheti	1	41.6455	44.8543	580
22	TA10106	Old collection	Kyrgyzstan	KYR	Os (Ozsakya)	1	40.7081	72.8788	743
23	TA10108	Old collection	Tajikistan	TJK	Unknown	1	39.2157	70.5265	NA
24	TA10109	Old collection	Turkmenistan	TKM	Balkan	1	38.4833	56.3	NA
25	TA10110	Old collection	Turkmenistan	TKM	Achal (Aschabadsk)	1	37.7097	58.6752	650
26	TA10112	Old collection	Turkmenistan	TKM	Unknown	1	37.8098	58.3484	NA
27	TA10114	Old collection	Turkmenistan	TKM	Achal (Aschabadsk)	1	37.8098	58.3484	650
28	TA10115	Old collection	Turkmenistan	TKM	Achal (Aschabadsk)	1	37.8098	58.3484	650
29	TA10116	Old collection	Turkmenistan	TKM	Achal (Aschabadsk)	1	37.8098	58.3484	650
30	TA10117	Old collection	Turkmenistan	TKM	Achal (Aschabadsk)	1	37.8098	58.3484	650
31	TA10118	Old collection	Turkmenistan	TKM	Achal (Aschabadsk)	1	37.9667	58.4	NA
32	TA10119	Old collection	Turkmenistan	TKM	Achal (Aschabadsk)	1	37.8098	58.3484	650
33	TA10120	Old collection	Turkmenistan	TKM	Achal (Aschabadsk)	1	37.8098	58.3484	650
34	TA10121	Old collection	Uzbekistan	UZB	Jizzakh	1	39.9333	68.4167	803
35	TA10122	Old collection	Uzbekistan	UZB	Syrdarja (Syrdarinsk)	1	40.3333	68.7667	275
36	TA10123	Old collection	Uzbekistan	UZB	Samarkand	1	39.4833	67.25	1030
37	TA10125	Old collection	Uzbekistan	UZB	Kaskadarja (Kashkadarinskaya)	1	38.65	66.2167	497
38	TA10126	Old collection	USSR	UNK	Unknown	1	NA	NA	NA
39	TA10127	Old collection	Georgia	GEO	Mtskheta-Mtianeti	1	41.8386	44.7339	470
40	TA10128	Old collection	Georgia	GEO	Mtskheta-Mtianeti	1	41.8317	44.7391	560
41	TA10129	Old collection	Armenia	ARM	Kotayk	1	40.1237	44.7342	1350
42	TA10133	Old collection	China	CHI	Unknown	1	43.5216	82.693	NA
43	TA10134	Old collection	China	CHI	Xinjiang Uygur	1	44.313	80.9308	930
44	TA10135	Old collection	China	CHI	Xinjiang Uygur	1	44.313	80.9308	950
45	TA10136	Old collection	China	CHI	Xinjiang Uygur	1	43.8147	82.4689	730
46	TA10137	Old collection	China	CHI	Xinjiang Uygur	1	43.8444	82.7737	1000
47	TA10138	Old collection	China	CHI	Xinjiang Uygur	1	43.8444	82.7737	1000
48	TA10139	Old collection	China	CHI	Xinjiang Uygur	1	43.5216	82.693	610
49	TA10140	Old collection	China	CHI	Shaanxi	1	34.2637	108.203	455
50	TA10141	Old collection	China	CHI	Unknown	1	43.5216	82.693	NA
51	TA10143	Old collection	Syrian	SYR	Raqqa	1	35.5228	38.7572	400
52	TA10144	Old collection	Syrian	SYR	Raqqa	1	35.625	38.7556	370
53	TA10145	Old collection	Syrian	SYR	Raqqa	1	35.6256	38.7586	NA
54	TA10155	Old collection	Tajikistan	TJK	Sughd (Panjakent)	1	39.4667	67.5	940
55	TA10156	Old collection	Tajikistan	TJK	Sughd (Panjakent)	1	39.4667	67.8333	1070
56	TA10157	Old collection	Tajikistan	TJK	Sughd (Shahriston)	1	39.75	68.6333	1590
57	TA10158	Old collection	Tajikistan	TJK	Sughd (Istarawshan)	1	39.9167	68.8333	920
58	TA10159	Old collection	Tajikistan	TJK	Sughd (Istarawshan)	1	40.0833	69.1167	680
59	TA10160	Old collection	Turkmenistan	TKM	Achal (Aschabadsk)	1	37.9167	58.1667	485
60	TA10161	Old collection	Turkmenistan	TKM	Achal (Aschabadsk)	1	37.9167	58.1167	420
61	TA10162	Old collection	Turkmenistan	TKM	Achal (Aschabadsk)	1	38	58.1167	610
62	TA10163	Old collection	Turkmenistan	TKM	Balkan	1	38.5667	56.4667	480
63	TA10164	Old collection	Turkmenistan	TKM	Balkan	1	38.5833	56.6333	520
64	TA10165	Old collection	Turkmenistan	TKM	Balkan	1	38.5833	56.6333	620
65	TA10166	Old collection	Turkmenistan	TKM	Balkan	1	38.3417	56.2974	580
66	TA10167	Old collection	Turkmenistan	TKM	Balkan	1	38.3417	56.2974	710
67	TA10168	Old collection	Turkmenistan	TKM	Balkan	1	38.3167	56.3833	920
68	TA10169	Old collection	Turkmenistan	TKM	Balkan	1	38.2	56.2	470
69	TA10170	Old collection	Turkmenistan	TKM	Balkan	1	38.1667	56.05	507
70	TA10171	Old collection	Turkmenistan	TKM	Balkan	1	38.3333	55.8667	580
71	TA10172	Old collection	Turkmenistan	TKM	Balkan	1	38.45	56.3667	545
72	TA10173	Old collection	Turkmenistan	TKM	Balkan	1	38.3	55.7	200
73	TA10174	Old collection	Turkmenistan	TKM	Balkan	1	38.25	55.7	140
74	TA10175	Old collection	Turkmenistan	TKM	Balkan	1	38.45	56	342
75	TA10176	Old collection	Turkmenistan	TKM	Balkan	1	38.3167	56.4333	895
76	TA10177	Old collection	Turkmenistan	TKM	Balkan	1	38.25	56.3333	895
77	TA10178	Old collection	Turkmenistan	TKM	Balkan	1	38.25	56.3333	895
78	TA10179	Old collection	Turkmenistan	TKM	Balkan	1	38.25	56.3333	895
79	TA10180	Old collection	Turkmenistan	TKM	Achal (Aschabadsk)	1	38.5333	57.1667	78
80	TA10181	Old collection	Turkmenistan	TKM	Balkan	1	40.0333	52.9667	26
81	TA10182	Old collection	Turkmenistan	TKM	Achal (Aschabadsk)	1	37.85	58.3633	280
82	TA10183	Old collection	Turkmenistan	TKM	Balkan	1	38.4319	56.2789	427
83	TA10184	Old collection	Turkmenistan	TKM	Balkan	1	38.3167	56.7333	1011
84	TA10185	Old collection	Turkmenistan	TKM	Achal (Aschabadsk)	1	38.5	56.8333	1463
85	TA10186	Old collection	Turkmenistan	TKM	Achal (Aschabadsk)	1	38.5833	57.1167	307
86	TA10187	Old collection	Turkmenistan	TKM	Achal (Aschabadsk)	1	38.8642	56.3375	231
87	TA10188	Old collection	Turkmenistan	TKM	Achal (Aschabadsk)	1	38.4881	56.7042	1073
88	TA10189	Old collection	Uzbekistan	UZB	Taskent (Tashkent)	1	41.1667	69.0333	343
89	TA10190	Old collection	Uzbekistan	UZB	Taskent (Tashkent)	1	41.1	69	343
90	TA10191	Old collection	Uzbekistan	UZB	Dzhizak	1	40.0833	67.5833	666
91	TA10192	Old collection	Uzbekistan	UZB	Jizzakh	1	39.9667	37.5	733
92	TA10193	Old collection	Uzbekistan	UZB	Samarkand	1	39.5	67.3833	1228
93	TA10194	Old collection	Uzbekistan	UZB	Fergana	1	40.45	71.0667	524
94	TA10195	Old collection	Uzbekistan	UZB	Fergana	1	40.4167	71.2	443
95	TA10196	Old collection	Uzbekistan	UZB	Fergana	1	40.5667	71.7	445
96	TA10197	Old collection	Uzbekistan	UZB	Namangan	1	40.8333	71.5	398
97	TA10198	Old collection	Uzbekistan	UZB	Namangan	1	40.8833	71.1	559
98	TA10199	Old collection	Uzbekistan	UZB	Surkhondaryo	1	38.3667	67.8667	631
99	TA10200	Old collection	Uzbekistan	UZB	Samarkand	1	39.9167	66.3667	520
100	TA10202	Old collection	Uzbekistan	UZB	Taskent (Tashkent)	1	40.9426	69.8895	881
101	TA10205	Old collection	Uzbekistan	UZB	Namangan	1	41.0835	70.5487	1150
102	TA10210	Old collection	Uzbekistan	UZB	Namangan	1	41.2333	71.6518	930
103	TA10211	Old collection	Uzbekistan	UZB	Andijon	1	40.8333	72.4368	660
104	TA10212	Old collection	Uzbekistan	UZB	Fergana	1	40.3167	71.7672	773
105	TA10213	Old collection	Uzbekistan	UZB	Andijon	1	40.6667	72.351	627
106	TA10291	Old collection	Tajikistan	TJK	Karotegin (Tojikobod)	1	39.2157	70.5265	1350
107	TA10292	Old collection	Tajikistan	TJK	Karotegin (Tojikobod)	1	39.2157	70.5265	1350
108	TA10293	Old collection	Tajikistan	TJK	Karotegin (Hissor)	1	38.5256	68.5472	450
109	TA10294	Old collection	Tajikistan	TJK	Karotegin (Hissor)	1	38.5256	68.5472	450
110	TA10295	Old collection	Tajikistan	TJK	Karotegin (Hissor)	1	38.5256	68.5472	450
111	TA10296	Old collection	Tajikistan	TJK	Karotegin (Hissor)	1	38.5256	68.5472	450
112	TA10297	Old collection	Tajikistan	TJK	Karotegin (Hissor)	1	38.5256	68.5472	450
113	TA10298	Old collection	Tajikistan	TJK	Karotegin (Hissor)	1	38.5256	68.5472	450
114	TA10299	Old collection	Tajikistan	TJK	Karotegin (Hissor)	1	38.5256	68.5472	450
115	TA10300	Old collection	Tajikistan	TJK	Karotegin (Hissor)	1	38.5256	68.5472	450
116	TA10301	Old collection	Tajikistan	TJK	Karotegin (Hissor)	1	38.5256	68.5472	450
117	TA10302	Old collection	Tajikistan	TJK	Karotegin (Hissor)	1	38.5256	68.5472	450
118	TA10303	Old collection	Tajikistan	TJK	Karotegin (Hissor)	1	38.5256	68.5472	450
119	TA10304	Old collection	Tajikistan	TJK	Karotegin (Hissor)	1	38.5256	68.5472	450
120	TA10305	Old collection	Tajikistan	TJK	Khatlon (Faizobod)	1	38.5667	69.3167	1400
121	TA10306	Old collection	Tajikistan	TJK	Khatlon (Faizobod)	1	38.5667	69.3167	1400
122	TA10307	Old collection	Tajikistan	TJK	Khatlon (Faizobod)	1	38.5667	69.3167	1400
123	TA10308	Old collection	Tajikistan	TJK	Khatlon (Faizobod)	1	38.5667	69.3167	1350
124	TA10309	Old collection	Tajikistan	TJK	Khatlon (Faizobod)	1	38.5667	69.3167	1200
125	TA10310	Old collection	Tajikistan	TJK	Khatlon (Faizobod)	1	38.5667	69.3167	1600
126	TA10311	Old collection	Tajikistan	TJK	Karotigin (Nurobod)	1	38.7167	70.4667	1600
127	TA10312	Old collection	Tajikistan	TJK	Karotigin (Nurobod)	1	38.7167	70.4667	1800
128	TA10313	Old collection	Tajikistan	TJK	Karotigin (Nurobod)	1	38.7167	70.4667	1800
129	TA10314	Old collection	Tajikistan	TJK	Karotegin (Tojikobod)	1	39.2157	70.5265	1300
130	TA10315	Old collection	Tajikistan	TJK	Karotegin	1	38.5833	68.8	800
131	TA10316	Old collection	Tajikistan	TJK	Karotegin	1	38.5833	68.8	800
132	TA10317	Old collection	Tajikistan	TJK	Karotegin	1	38.5833	68.8	800
133	TA10318	Old collection	Tajikistan	TJK	Karotegin	1	38.5833	68.8	800
134	TA10319	Old collection	Tajikistan	TJK	Karotegin	1	38.5833	68.8	800
135	TA10320	Old collection	Tajikistan	TJK	Karotegin (Jirgatol)	1	39.2167	71.2	2000
136	TA10321	Old collection	Tajikistan	TJK	Karotegin (Jirgatol)	1	39.2167	71.2	2000
137	TA10322	Old collection	Tajikistan	TJK	Sughd (Istarawshan)	1	39.9106	69.0064	550
138	TA10323	Old collection	Tajikistan	TJK	Sughd (Istarawshan)	1	39.9106	69.0064	550
139	TA10324	Old collection	Tajikistan	TJK	Sughd (Istarawshan)	1	39.9106	69.0064	550
140	TA10325	Old collection	Tajikistan	TJK	Sughd (Bobojon Ghafurov)	1	40.2833	69.6167	400
141	TA10326	Old collection	Tajikistan	TJK	Sughd (Bobojon Ghafurov)	1	40.2833	69.6167	400
142	TA10327	Old collection	Tajikistan	TJK	Sughd (Bobojon Ghafurov)	1	40.2833	69.6167	800
143	TA10328	Old collection	Tajikistan	TJK	Sughd (Bobojon Ghafurov)	1	40.2833	69.6167	800
144	TA10329	Old collection	Kyrgyzstan	KYR	Unknown	1	42.0575	79.0796	2550
145	TA10330	Old collection	Kyrgyzstan	KYR	Unknown	1	42.0575	79.0796	2550
146	TA10331	Old collection	Uzbekistan	UZB	Syrdarja (Syrdarinsk)	1	40.2167	69.2333	1200
147	TA10918	Recent 2012	Georgia	GEO	Kvemo Kartli	1	41.6099	44.8017	521
148	TA10920	Recent 2012	Georgia	GEO	Kvemo Kartli	1	41.6099	44.8017	521
149	TA10922	Recent 2012	Georgia	GEO	Kvemo Kartli	1	41.6099	44.8017	521
150	TA10923	Recent 2012	Georgia	GEO	Kvemo Kartli	1	41.6099	44.8017	521
151	TA10924	Recent 2012	Georgia	GEO	Kvemo Kartli	1	41.5971	44.8402	493
152	TA10925	Recent 2012	Georgia	GEO	Kvemo Kartli	1	41.5971	44.8402	493
153	TA10932	Recent 2012	Azerbaijan	AZB	Daghlig Shirvan [Qobustan]	1	40.5001	48.9802	631
154	TA10953	Recent 2012	Azerbaijan	AZB	Naxcivan	1	39.4561	45.3651	1310
155	TA10954	Recent 2012	Azerbaijan	AZB	Naxcivan	1	39.456	45.3654	1313
156	TA10955	Recent 2012	Azerbaijan	AZB	Naxcivan	1	39.4575	45.361	1319
157	TA10957	Recent 2012	Azerbaijan	AZB	Naxcivan	1	39.4575	45.361	1319
158	TA10958	Recent 2012	Azerbaijan	AZB	Naxcivan	1	39.5438	45.2602	2018
159	TA10960	Recent 2012	Azerbaijan	AZB	Naxcivan	1	39.5438	45.2602	2018
160	TA10961	Recent 2012	Azerbaijan	AZB	Naxcivan	1	39.2141	45.4084	898
161	TA11020	Old collection	Armenia	ARM	Kotayk	1	40.7875	44.1972	NA
162	TA1577	Old collection	Unknown	UNK	Unknown	1	NA	NA	NA
163	TA1578	Old collection	Unknown	UNK	Unknown	1	NA	NA	NA
164	TA1579	Old collection	Unknown	UNK	Unknown	1	NA	NA	NA
165	TA1580	Old collection	Unknown	UNK	Unknown	1	NA	NA	NA
166	TA1587	Old collection	Turkey	TKY	Hakk_ri	1	37.7197	44.5688	1670
167	TA1588	Old collection	Turkey	TKY	Van	1	38.8985	43.5587	1700
168	TA1589	Old collection	Turkey	TKY	Van	1	38.8985	43.5587	1700
169	TA1590	Old collection	Turkey	TKY	Kars	1	40.1484	43.3466	1010
170	TA1591	Old collection	Turkey	TKY	Kars	1	40.1484	43.3466	1010
171	TA1592	Old collection	Turkey	TKY	Kars	1	40.1484	43.3466	1010
172	TA1593	Old collection	Turkey	TKY	Kars	1	40.1345	43.0486	1190
173	TA1594	Old collection	Turkey	TKY	Kars	1	40.0644	42.8693	1300
174	TA1595	Old collection	Unknown	UNK	Unknown	1	NA	NA	NA
175	TA1596	Old collection	Unknown	UNK	Unknown	1	NA	NA	NA
176	TA1597	Old collection	Unknown	UNK	Unknown	1	NA	NA	NA
177	TA1598	Old collection	USSR	UNK	Unknown	1	NA	NA	NA
178	TA1601	Old collection	China	CHI	Xinjiang Uygur	1	43.5216	82.693	610
179	TA1602	Old collection	China	CHI	Henan	1	34.0595	111.047	600
180	TA1603	Old collection	China	CHI	Shaanxi	1	34.2637	108.203	455
181	TA1617	Old collection	Turkmenistan	TKM	Balkan	1	38.4833	56.3	730
182	TA1620	Old collection	Afghanistan	AFG	Samangan	1	36.2182	67.9401	1240
183	TA1621	Old collection	Georgia	GEO	Samtskhe-Javakheti	1	41.5739	43.2561	1100
184	TA1623	Old collection	Turkmenistan	TKM	Balkan	1	38.4833	56.3	730
185	TA1625	Old collection	Azerbaijan	AZB	Unknown	1	40.5702	48.7477	NA
186	TA1629	Old collection	Afghanistan	AFG	Faryab	1	35.7844	64.3716	1100
187	TA1630	Old collection	Afghanistan	AFG	Samangan	1	36.4167	67.75	458
188	TA1631	Old collection	Afghanistan	AFG	Faryab	1	35.7167	64.9	915
189	TA1632	Old collection	Afghanistan	AFG	Badghis	1	34.9667	63.1833	975
190	TA1633	Old collection	Afghanistan	AFG	Badghis	1	34.95	63.2167	1068
191	TA1634	Old collection	Turkey	TKY	Canakkale	1	40.0097	26.3274	138
192	TA1639	Old collection	Afghanistan	AFG	Unknown	1	35.7242	63.4845	NA
193	TA1640	Old collection	Armenia	ARM	Unknown	1	40.335	44.2648	NA
194	TA1650	Old collection	Unknown	UNK	Unknown	1	NA	NA	NA
195	TA1652	Old collection	Tajikistan	TJK	Khation (Hamadoni)	1	37.6	69.7333	1140
196	TA1655	Old collection	Afghanistan	AFG	Baghlan	1	36.3903	68.898	518
197	TA1657	Old collection	Azerbaijan	AZB	Daghlig Shirvan/Samaxi	1	40.75	48.7333	410
198	TA1676	Old collection	Azerbaijan	AZB	Absheron/Baki	1	40.3974	49.8524	25
199	TA1681	Old collection	Azerbaijan	AZB	Shaki-Zaqatala/Shaki	1	41.2	47.1667	540
200	TA1688	Old collection	Unknown	UNK	Unknown	1	NA	NA	NA
201	TA1689	Old collection	Unknown	UNK	Unknown	1	NA	NA	NA
202	TA1692	Old collection	Turkmenistan	TKM	Balkan	1	38.4833	56.3	730
203	TA1694	Old collection	Turkmenistan	TKM	Balkan	1	38.4833	56.3	450
204	TA1697	Old collection	Unknown	UNK	Unknown	1	NA	NA	NA
205	TA1698	Old collection	Russia	RUS	Dagestan	1	42.1333	47.1	1850
206	TA1699	Old collection	Russia	RUS	Dagestan	1	42.1333	47.1	1850
207	TA1700	Old collection	Armenia	ARM	Yerevan	1	40.335	44.2648	NA
208	TA1704	Old collection	Tajikistan	TJK	Unknown	1	38.5667	69.3167	NA
209	TA1706	Old collection	Iran	IRN	Golestan	1	36.8467	54.44	130
210	TA1707	Old collection	Unknown	UNK	Unknown	1	NA	NA	NA
211	TA1708	Old collection	Unknown	UNK	Unknown	1	NA	NA	NA
212	TA1709	Old collection	Unknown	UNK	Unknown	1	NA	NA	NA
213	TA1712	Old collection	Unknown	UNK	Unknown	1	NA	NA	NA
214	TA1716	Old collection	Turkey	TKY	Van	1	38.4167	43.3	1650
215	TA1717	Old collection	Iran	IRN	Khorasan	1	37.11	58.5104	1310
216	TA2118	Old collection	Unknown	UNK	Unknown	1	NA	NA	NA
217	TA2119	Old collection	Turkey	TKY	Kars	1	40.0644	42.8693	1275
218	TA2123	Old collection	Iran	IRN	Unknown	1	38.6333	45.6833	NA
219	TA2370	Old collection	Unknown	UNK	Unknown	1	NA	NA	NA
220	TA2371	Old collection	Uzbekistan	UZB	Taskent (Tashkent)	1	41.2667	69.2167	425
221	TA2372	Old collection	Afghanistan	AFG	Unknown	1	35.7242	63.4845	NA
222	TA2373	Old collection	Unknown	UNK	Unknown	1	NA	NA	NA
223	TA2374	Old collection	Pakistan	PAK	Baluchistan	1	30.1321	66.9617	1690
224	TA2379	Old collection	Pakistan	PAK	Baluchistan	1	30.2069	66.9672	1645
225	TA2380	Old collection	Pakistan	PAK	Baluchistan	1	30.2069	66.9672	1645
226	TA2381	Old collection	Pakistan	PAK	Baluchistan	1	30.2069	66.9672	1645
227	TA2382	Old collection	Pakistan	PAK	Baluchistan	1	30.2069	66.9672	1645
228	TA2383	Old collection	Pakistan	PAK	Baluchistan	1	30.4167	66.4167	1515
229	TA2384	Old collection	Pakistan	PAK	Baluchistan	1	30.4167	66.4167	1515
230	TA2385	Old collection	Pakistan	PAK	Baluchistan	1	30.9167	66.45	1330
231	TA2386	Old collection	Pakistan	PAK	Baluchistan	1	30.919	66.4776	1395
232	TA2387	Old collection	Afghanistan	AFG	Kandahar	1	31.8333	66.3333	1330
233	TA2388	Old collection	Afghanistan	AFG	Kandahar	1	31.8333	66.3333	1330
234	TA2389	Old collection	Afghanistan	AFG	Zabol	1	31.9737	66.6854	1500
235	TA2390	Old collection	Afghanistan	AFG	Zabol	1	31.9737	66.6854	1500
236	TA2391	Old collection	Afghanistan	AFG	Zabol	1	31.9737	66.6854	1500
237	TA2392	Old collection	Afghanistan	AFG	Zabol	1	31.9737	66.6854	1500
238	TA2393	Old collection	Afghanistan	AFG	Zabol_Ghazni	1	32.8333	67.8333	2085
239	TA2394	Old collection	Afghanistan	AFG	Zabol_Ghazni	1	32.8333	67.8333	2085
240	TA2395	Old collection	Afghanistan	AFG	Vardak	1	34.0197	68.7291	2075
241	TA2396	Old collection	Afghanistan	AFG	Kabul	1	34.5914	69.0848	1800
242	TA2397	Old collection	Afghanistan	AFG	Kabul	1	33.9101	68.6733	2250
243	TA2398	Old collection	Afghanistan	AFG	Kabul	1	34.5133	69.2317	1950
244	TA2399	Old collection	Afghanistan	AFG	Kabul	1	34.5133	69.2317	1950
245	TA2400	Old collection	Afghanistan	AFG	Kabul	1	34.5051	69.2465	1800
246	TA2401	Old collection	Afghanistan	AFG	Unknown	1	35.7242	63.4845	NA
247	TA2402	Old collection	Afghanistan	AFG	Baghlan	1	35.7682	68.7751	735
248	TA2403	Old collection	Afghanistan	AFG	Baghlan	1	35.8623	68.7909	720
249	TA2404	Old collection	Afghanistan	AFG	Baghlan	1	36.0524	68.6028	675
250	TA2405	Old collection	Afghanistan	AFG	Baghlan	1	36.1379	68.5135	675
251	TA2406	Old collection	Afghanistan	AFG	Baghlan	1	36.1379	68.5135	675
252	TA2407	Old collection	Afghanistan	AFG	Baghlan	1	36.1379	68.5135	675
253	TA2408	Old collection	Afghanistan	AFG	Baghlan	1	36.1401	68.5022	695
254	TA2409	Old collection	Afghanistan	AFG	Baghlan	1	36.1645	68.3968	940
255	TA2410	Old collection	Afghanistan	AFG	Baghlan	1	36.1645	68.3968	940
256	TA2411	Old collection	Afghanistan	AFG	Baghlan	1	36.1645	68.3968	940
257	TA2412	Old collection	Afghanistan	AFG	Baghlan	1	36.1761	68.3775	1040
258	TA2413	Old collection	Afghanistan	AFG	Baghlan	1	36.1761	68.3775	1040
259	TA2414	Old collection	Afghanistan	AFG	Baghlan	1	36.1761	68.3775	1040
260	TA2415	Old collection	Afghanistan	AFG	Baghlan	1	36.6596	65.7312	363
261	TA2416	Old collection	Afghanistan	AFG	Baghlan	1	36.6596	65.7312	363
262	TA2417	Old collection	Afghanistan	AFG	Baghlan	1	36.6596	65.7312	363
263	TA2419	Old collection	Afghanistan	AFG	Baghlan	1	36.1889	68.3068	1330
264	TA2420	Old collection	Afghanistan	AFG	Faryab	1	36.7389	64.9292	355
265	TA2421	Old collection	Afghanistan	AFG	Faryab	1	36.0846	64.8358	670
266	TA2422	Old collection	Afghanistan	AFG	Faryab	1	36.0846	64.8358	670
267	TA2423	Old collection	Afghanistan	AFG	Faryab	1	36.0846	64.8358	670
268	TA2424	Old collection	Afghanistan	AFG	Faryab	1	36.0846	64.8358	670
269	TA2425	Old collection	Afghanistan	AFG	Faryab	1	36.0846	64.8358	670
270	TA2426	Old collection	Afghanistan	AFG	Faryab	1	35.9184	64.7672	850
271	TA2427	Old collection	Afghanistan	AFG	Faryab	1	35.9184	64.7672	850
272	TA2428	Old collection	Afghanistan	AFG	Faryab	1	35.9068	64.6971	860
273	TA2429	Old collection	Afghanistan	AFG	Faryab	1	35.9068	64.6971	860
274	TA2430	Old collection	Afghanistan	AFG	Faryab	1	35.9068	64.6971	860
275	TA2431	Old collection	Afghanistan	AFG	Faryab	1	35.9068	64.6971	860
276	TA2432	Old collection	Afghanistan	AFG	Faryab	1	35.8829	64.6786	950
277	TA2433	Old collection	Afghanistan	AFG	Faryab	1	35.854	64.5584	825
278	TA2434	Old collection	Afghanistan	AFG	Faryab	1	35.7844	64.3716	1100
279	TA2435	Old collection	Afghanistan	AFG	Faryab	1	35.7844	64.3716	1100
280	TA2436	Old collection	Afghanistan	AFG	Faryab	1	35.7465	63.8649	705
281	TA2437	Old collection	Afghanistan	AFG	Faryab	1	35.7465	63.8649	705
282	TA2438	Old collection	Afghanistan	AFG	Badghis	1	35.7242	63.4845	500
283	TA2439	Old collection	Afghanistan	AFG	Badghis	1	35.7242	63.4845	500
284	TA2440	Old collection	Afghanistan	AFG	Badghis	1	35.6127	63.3801	520
285	TA2441	Old collection	Afghanistan	AFG	Badghis	1	35.5099	63.365	500
286	TA2442	Old collection	Afghanistan	AFG	Badghis	1	35.5099	63.365	500
287	TA2443	Old collection	Afghanistan	AFG	Badghis	1	35.1356	63.3334	920
288	TA2444	Old collection	Afghanistan	AFG	Badghis	1	35.1143	63.4021	940
289	TA2445	Old collection	Iran	IRN	Qazvin	1	36.2553	36.2553	1290
290	TA2447	Old collection	Iran	IRN	Tehran	1	35.898	50.9776	1600
291	TA2448	Old collection	Iran	IRN	Tehran	1	35.898	50.9776	1600
292	TA2458	Old collection	Iran	IRN	Golestan	1	37.3991	55.5002	100
293	TA2462	Old collection	Iran	IRN	Mazandaran	1	36.6051	53.2246	43
294	TA2482	Old collection	Iran	IRN	Gilan	1	38.4245	48.8589	-28
295	TA2486	Old collection	Iran	IRN	Azarbayjan-e Gharbi (West Azerbaijan)	1	36.76	45.72	1335
296	TA2487	Old collection	Iran	IRN	Azarbayjan-e Gharbi (West Azerbaijan)	1	36.76	45.72	1335
297	TA2488	Old collection	Iran	IRN	Azarbayjan-e Gharbi (West Azerbaijan)	1	37.0848	45.4793	1270
298	TA2489	Old collection	Iran	IRN	Azarbayjan-e Gharbi (West Azerbaijan)	1	38.3578	44.8709	1320
299	TA2492	Old collection	Iran	IRN	Azarbayjan-e Sharqi (East Azerbaijan)	1	38.459	45.6084	1170
300	TA2493	Old collection	Iran	IRN	Azarbayjan-e Sharqi (East Azerbaijan)	1	38.459	45.6084	1170
301	TA2494	Old collection	Iran	IRN	Azarbayjan-e Sharqi (East Azerbaijan)	1	38.5192	45.3612	1045
302	TA2495	Old collection	Iran	IRN	Azarbayjan-e Sharqi (East Azerbaijan)	1	38.0833	46.3	1400
303	TA2500	Old collection	Turkey	TKY	Van	1	38.34	43.1879	1710
304	TA2501	Old collection	Turkey	TKY	Van	1	38.34	43.1879	1710
305	TA2502	Old collection	Turkey	TKY	Van	1	38.6531	43.6542	1860
306	TA2503	Old collection	Turkey	TKY	Van	1	38.6531	43.6542	1860
307	TA2504	Old collection	Turkey	TKY	Van	1	38.8504	43.4454	1740
308	TA2505	Old collection	Turkey	TKY	Van	1	38.8504	43.4454	1740
309	TA2506	Old collection	Turkey	TKY	Van	1	38.9167	43.602	1720
310	TA2507	Old collection	Turkey	TKY	Van	1	38.9573	43.6597	1780
311	TA2508	Old collection	Turkey	TKY	Van	1	38.9573	43.6597	1780
312	TA2509	Old collection	Turkey	TKY	Van	1	38.9573	43.6597	1780
313	TA2510	Old collection	Turkey	TKY	Van	1	38.985	43.558	1740
314	TA2511	Old collection	Iran	IRN	Azarbayjan-e Gharbi (West Azerbaijan)	1	39.2833	44.6814	1200
315	TA2512	Old collection	Iran	IRN	Azarbayjan-e Gharbi (West Azerbaijan)	1	39.2482	44.8833	900
316	TA2513	Old collection	Iran	IRN	Azarbayjan-e Gharbi (West Azerbaijan)	1	39.1833	44.919	970
317	TA2514	Old collection	Iran	IRN	Azarbayjan-e Gharbi (West Azerbaijan)	1	38.9028	45.033	1100
318	TA2515	Old collection	Iran	IRN	Azarbayjan-e Gharbi (West Azerbaijan)	1	38.9028	45.033	1100
319	TA2516	Old collection	Iran	IRN	Azarbayjan-e Sharqi (East Azerbaijan)	1	38.6333	45.6833	1520
320	TA2517	Old collection	Iran	IRN	Azarbayjan-e Sharqi (East Azerbaijan)	1	38.6333	45.6833	1445
321	TA2518	Old collection	Iran	IRN	Azarbayjan-e Sharqi (East Azerbaijan)	1	38.8028	45.6067	1070
322	TA2519	Old collection	Iran	IRN	Azarbayjan-e Sharqi (East Azerbaijan)	1	38.7873	45.6029	1135
323	TA2520	Old collection	Iran	IRN	Azarbayjan-e Sharqi (East Azerbaijan)	1	37.4945	47.4802	1340
324	TA2521	Old collection	Iran	IRN	Zanjan	1	37.0278	48.0041	1235
325	TA2522	Old collection	Iran	IRN	Qazvin	1	36.2504	49.9596	1280
326	TA2523	Old collection	Iran	IRN	Zanjan	1	35.8523	49.4426	1500
327	TA2526	Old collection	Iran	IRN	Kermanshah	1	34.1664	46.3829	1380
328	TA2531	Old collection	Afghanistan	AFG	Kabul	1	34.8465	69.1534	1600
329	TA2532	Old collection	Afghanistan	AFG	Kabul	1	34.5508	69.0345	2020
330	TA2533	Old collection	Afghanistan	AFG	Konduz	1	36.8291	68.8568	390
331	TA2534	Old collection	Afghanistan	AFG	Takhar	1	36.7411	69.5125	800
332	TA2535	Old collection	Afghanistan	AFG	Takhar	1	36.7411	69.5125	800
333	TA2536	Old collection	Afghanistan	AFG	Takhar	1	36.4699	69.8669	1300
334	TA2537	Old collection	Afghanistan	AFG	Takhar	1	36.6816	69.8071	1620
335	TA2538	Old collection	Afghanistan	AFG	Takhar	1	36.6816	69.8071	1620
336	TA2539	Old collection	Afghanistan	AFG	Badakhshan (Baharak)	1	37.07	71.142	2060
337	TA2540	Old collection	Afghanistan	AFG	Badakhshan (Baharak)	1	37.07	71.142	2060
338	TA2541	Old collection	Afghanistan	AFG	Badakhshan (Baharak)	1	37.05	71.2257	1580
339	TA2542	Old collection	Afghanistan	AFG	Badakhshan	1	36.9806	70.9006	1470
340	TA2543	Old collection	Afghanistan	AFG	Badakhshan	1	36.9806	70.9006	1470
341	TA2544	Old collection	Afghanistan	AFG	Badakhshan	1	36.9709	70.9217	1410
342	TA2545	Old collection	Afghanistan	AFG	Badakhshan	1	36.9551	71.0129	1460
343	TA2546	Old collection	Afghanistan	AFG	Badakhshan	1	36.9551	71.0129	1460
344	TA2547	Old collection	Afghanistan	AFG	Badakhshan	1	36.8269	70.8443	1490
345	TA2548	Old collection	Afghanistan	AFG	Badakhshan	1	36.8269	70.8443	1490
346	TA2549	Old collection	Afghanistan	AFG	Badakhshan	1	37.0305	71.0122	1750
347	TA2550	Old collection	Afghanistan	AFG	Badakhshan	1	37.0481	71.0863	1960
348	TA2551	Old collection	Afghanistan	AFG	Badakhshan	1	37.0481	71.0863	1960
349	TA2552	Old collection	Afghanistan	AFG	Badakhshan	1	37.0675	71.1567	2100
350	TA2553	Old collection	Afghanistan	AFG	Badakhshan	1	36.9639	70.959	1590
351	TA2554	Old collection	Afghanistan	AFG	Badakhshan	1	36.9639	70.959	1590
352	TA2555	Old collection	Afghanistan	AFG	Badakhshan	1	36.8071	71.0678	1750
353	TA2556	Old collection	Afghanistan	AFG	Badakhshan	1	36.6365	71.153	2160
354	TA2557	Old collection	Afghanistan	AFG	Badakhshan	1	36.6365	71.153	2160
355	TA2558	Old collection	Afghanistan	AFG	Badakhshan	1	36.6921	71.1351	2120
356	TA2559	Old collection	Afghanistan	AFG	Konduz	1	36.3903	68.898	480
357	TA2560	Old collection	Azerbaijan	AZB	Absheron/Sumqayit	1	40.6265	49.5566	-20
358	TA2566	Old collection	Armenia	ARM	Yerevan	1	40.1833	44.5167	1010
359	TA2567	Old collection	Armenia	ARM	Yerevan	1	40.1833	44.5167	1010
360	TA2569	Old collection	Armenia	ARM	Yerevan	1	40.1833	44.5167	1010
361	TA2570	Old collection	Armenia	ARM	Yerevan	1	40.1581	44.44	885
362	TA2571	Old collection	Armenia	ARM	Yerevan	1	40.161	44.6484	1570
363	TA2572	Old collection	Armenia	ARM	Armavir	1	40.3239	44.2675	1350
364	TA2573	Old collection	Armenia	ARM	Armavir	1	40.3239	44.2675	1350
365	TA2574	Old collection	Armenia	ARM	Armavir	1	40.335	44.2648	1450
366	TA2575	Old collection	Armenia	ARM	Armavir	1	40.335	44.2648	1450
367	TA2577	Old collection	Georgia	GEO	Kvemo Kartli	1	41.525	44.7789	480
368	TA2579	Old collection	Georgia	GEO	Tbilisi	1	41.7419	44.8339	570
369	TA2581	Old collection	Georgia	GEO	Tbilisi	1	41.8151	44.783	425
370	TA2583	Old collection	Georgia	GEO	Tbilisi	1	41.8151	44.783	425
371	TA2586	Old collection	Georgia	GEO	Shida Kartli	1	42.0172	44.1417	630
372	TA2587	Old collection	Afghanistan	AFG	Kabul	1	34.5908	68.9574	2310
373	CIae25	Received from NSGC	Iran	IRN	Gilan	2	NA	NA	NA
374	KU2147	Received from ICARDA	Iran	IRN	Gilan	2	NA	NA	NA
375	TA10081	Old collection	Azerbaijan	AZB	Unknown	2	41.6332	46.6501	NA
376	TA10085	Old collection	Azerbaijan	AZB	Shaki-Zaqatala/Zaqatala	2	41.6332	46.6501	1000
377	TA10086	Old collection	Azerbaijan	AZB	Shaki-Zaqatala/Shaki	2	41.2002	47.1673	600
378	TA10087	Old collection	Azerbaijan	AZB	Aran/Goychay	2	40.6539	47.7406	500
379	TA10089	Old collection	Azerbaijan	AZB	Daghlig Shirvan/Aghsu	2	40.5692	48.4008	1000
380	TA10090	Old collection	Azerbaijan	AZB	Aran/Ismayilli	2	40.79	48.1519	700
381	TA10091	Old collection	Azerbaijan	AZB	Yukhari Garabakh/Fuzuli	2	39.6003	47.1431	660
382	TA10092	Old collection	Azerbaijan	AZB	Ganja-Gazakh/Gadabay	2	40.5514	45.813	500
383	TA10093	Old collection	Azerbaijan	AZB	Kalbajar-Lachin/Zangilan	2	39.0861	46.654	1000
384	TA10094	Old collection	Azerbaijan	AZB	Kalbajar-Lachin/Zangilan	2	39.0525	46.6128	400
385	TA10095	Old collection	Armenia	ARM	Syunik	2	39.5167	46.3667	640
386	TA10098	Old collection	Armenia	ARM	Unknown	2	40.335	44.2648	NA
387	TA10101	Old collection	Armenia	ARM	Unknown	2	40.335	44.2648	NA
388	TA10124	Old collection	Uzbekistan	UZB	Taskent (Tashkent)	2	41.2667	69.2167	433
389	TA10130	Old collection	Armenia	ARM	Syunik	2	39.493	46.346	1800
390	TA10131	Old collection	Armenia	ARM	Syunik	2	39.5079	46.3386	1800
391	TA10132	Old collection	Armenia	ARM	Unknown	2	40.335	44.2648	NA
392	TA10142	Old collection	Syrian	SYR	Al Hasakah	2	36.7189	40.1475	340
393	TA10417	Old collection	Unknown	UNK	Unknown	2	NA	NA	NA
394	TA10836	Old collection	Azerbaijan	AZB	Lankaran/Lerik	2	38.7753	48.4153	1800
395	TA10837	Old collection	Azerbaijan	AZB	Daghlig Shirvan/Samaxi	2	40.75	48.7333	644
396	TA10838	Old collection	Azerbaijan	AZB	Shaki-Zaqatala/Gabala	2	40.9814	47.8458	780
397	TA10839	Old collection	Azerbaijan	AZB	Aran/Ismayilli	2	40.7902	48.1515	729
398	TA10869	Old collection	Azerbaijan	AZB	Daghlig Shirvan/Samaxi	2	40.6333	48.6167	NA
399	TA10871	Old collection	Azerbaijan	AZB	Lankaran/Lankaran	2	38.75	48.4	NA
400	TA10872	Old collection	Azerbaijan	AZB	Absheron/Baki	2	40.5	50	NA
401	TA10919	Recent 2012	Georgia	GEO	Kvemo Kartli	2	41.6099	44.8017	521
402	TA10921	Recent 2012	Georgia	GEO	Kvemo Kartli	2	41.6099	44.8017	521
403	TA10933	Recent 2012	Azerbaijan	AZB	Daghlig Shirvan [Qobustan]	2	40.5321	48.8973	805
404	TA10934	Recent 2012	Azerbaijan	AZB	Daghlig Shirvan [Qobustan]	2	40.5321	48.8973	805
405	TA10935	Recent 2012	Azerbaijan	AZB	Daghlig Shirvan [Qobustan]	2	40.6489	48.4783	803
406	TA10939	Recent 2012	Azerbaijan	AZB	Daghlig Shirvan [Samaxi]	2	40.6369	48.6073	669
407	TA10940	Recent 2012	Azerbaijan	AZB	Daghlig Shirvan [Samaxi]	2	40.6368	48.6076	660
408	TA10941	Recent 2012	Azerbaijan	AZB	Daghlig Shirvan [Samaxi]	2	40.6489	48.4783	790
409	TA10942	Recent 2012	Azerbaijan	AZB	Daghlig Shirvan [Agsu]	2	40.5918	48.416	470
410	TA10944	Recent 2012	Azerbaijan	AZB	Daghlig Shirvan [Agsu]	2	40.5924	48.4153	465
411	TA10945	Recent 2012	Azerbaijan	AZB	Daghlig Shirvan [Agsu]	2	40.5862	48.4158	370
412	TA10946	Recent 2012	Azerbaijan	AZB	Daghlig Shirvan [Agsu]	2	40.5862	48.4149	375
413	TA10948	Recent 2012	Azerbaijan	AZB	Daghlig Shirvan [Agsu]	2	40.625	48.2493	315
414	TA10949	Recent 2012	Azerbaijan	AZB	Daghlig Shirvan [Agsu]	2	40.625	48.2493	315
415	TA10951	Recent 2012	Azerbaijan	AZB	Daghlig Shirvan [Agsu]	2	40.6254	48.2489	328
416	TA10952	Recent 2012	Azerbaijan	AZB	Daghlig Shirvan [Agsu]	2	40.6254	48.2491	334
417	TA11021	Old collection	Armenia	ARM	Vayots Dzor	2	39.7817	45.1728	1398
418	TA1582	Old collection	Turkey	TKY	Hakk_ri	2	37.2679	44.5523	1700
419	TA1583	Old collection	Turkey	TKY	Hakk_ri	2	37.2679	44.5523	1700
420	TA1584	Old collection	Turkey	TKY	Hakk_ri	2	37.2679	44.5523	1700
421	TA1585	Old collection	Turkey	TKY	Hakk_ri	2	37.2679	44.5523	1700
422	TA1586	Old collection	Turkey	TKY	Hakk_ri	2	37.4225	44.4816	1620
423	TA1599	Old collection	Iran	IRN	Mazandaran	2	36.906	50.658	0
424	TA1600	Old collection	Iran	IRN	Mazandaran	2	36.6949	53.5364	10
425	TA1605	Old collection	Unknown	UNK	Unknown	2	NA	NA	NA
426	TA1606	Old collection	Iran	IRN	Mazandaran	2	35.8881	52.01	2210
427	TA1612	Old collection	USSR	UNK	Unknown	2	NA	NA	NA
428	TA1613	Old collection	Russia	RUS	Dagestan	2	42.1333	47.1	NA
429	TA1615	Old collection	Turkmenistan	TKM	Balkan	2	38.4833	56.3	320
430	TA1616	Old collection	Russia	RUS	Dagestan	2	42.1333	47.1	1850
431	TA1618	Old collection	Iran	IRN	Mazandaran	2	36.7356	53.7973	0
432	TA1619	Old collection	Iran	IRN	Mazandaran	2	36.7917	54.0308	-15
433	TA1622	Old collection	Azerbaijan	AZB	Guba-Khachmaz/Davaci	2	41.1226	49.021	320
434	TA1624	Old collection	Azerbaijan	AZB	Yukhari Garabakh/Tartar	2	40.5	47	255
435	TA1626	Old collection	Turkmenistan	TKM	Achal (Aschabadsk)	2	38.4167	57.4	1200
436	TA1635	Old collection	Unknown	UNK	Unknown	2	NA	NA	NA
437	TA1641	Old collection	Iran	IRN	Mazandaran	2	36.6111	53.2312	33
438	TA1642	Old collection	Iran	IRN	Golestan	2	36.9477	54.0527	-28
439	TA1643	Old collection	Iran	IRN	Markazi	2	35.1132	50.0098	1535
440	TA1644	Old collection	Iran	IRN	Golestan	2	36.9083	54.8689	130
441	TA1645	Old collection	Iran	IRN	Mazandaran	2	36.5218	52.9665	40
442	TA1649	Old collection	Iran	IRN	Gilan	2	37.4716	49.4646	-30
443	TA1651	Old collection	Iran	IRN	Golestan	2	36.8467	54.44	130
444	TA1653	Old collection	Tajikistan	TJK	Unknown	2	38.5667	69.3167	NA
445	TA1656	Old collection	Azerbaijan	AZB	Aran/Goychay	2	40.6194	47.7227	160
446	TA1658	Old collection	Azerbaijan	AZB	Unknown	2	40.5702	48.7477	NA
447	TA1659	Old collection	Azerbaijan	AZB	Daghlig Shirvan/Samaxi	2	40.75	48.7333	410
448	TA1660	Old collection	Azerbaijan	AZB	Unknown	2	40.5702	48.7477	NA
449	TA1661	Old collection	Azerbaijan	AZB	Unknown	2	40.5702	48.7477	NA
450	TA1662	Old collection	Azerbaijan	AZB	Naxcivan	2	38.9	46.0167	160
451	TA1664	Old collection	Azerbaijan	AZB	Lankaran/Masalli	2	39.05	48.6667	100
452	TA1665	Old collection	Azerbaijan	AZB	Daghlig Shirvan/Samaxi	2	40.0833	49.4	650
453	TA1666	Old collection	Azerbaijan	AZB	Daghlig Shirvan/Samaxi	2	40.0833	49.4	630
454	TA1667	Old collection	Azerbaijan	AZB	Daghlig Shirvan/Samaxi	2	40.0833	49.4	630
455	TA1668	Old collection	Azerbaijan	AZB	Daghlig Shirvan/Samaxi	2	40.0833	49.4	800
456	TA1669	Old collection	Azerbaijan	AZB	Daghlig Shirvan/Samaxi	2	40.0833	49.4	780
457	TA1670	Old collection	Azerbaijan	AZB	Shaki-Zaqatala/Gabala	2	40.9833	47.8333	600
458	TA1671	Old collection	Azerbaijan	AZB	Guba-Khachmaz/Qusar	2	41.45	48.45	750
459	TA1672	Old collection	Azerbaijan	AZB	Daghlig Shirvan/Samaxi	2	40.6333	48.6167	1230
460	TA1673	Old collection	Azerbaijan	AZB	Lankaran/Lankaran	2	38.9333	48.25	1300
461	TA1674	Old collection	Russia	RUS	Dagestan	2	42.1333	47.1	1850
462	TA1675	Old collection	Turkmenistan	TKM	Unknown	2	37.8098	58.3484	1400
463	TA1677	Old collection	Azerbaijan	AZB	Daghlig Shirvan/Samaxi	2	40.6333	48.6167	600
464	TA1678	Old collection	Azerbaijan	AZB	Daghlig Shirvan/Samaxi	2	40.6333	48.6167	630
465	TA1679	Old collection	Azerbaijan	AZB	Daghlig Shirvan/Samaxi	2	40.6333	48.6167	780
466	TA1680	Old collection	Azerbaijan	AZB	Daghlig Shirvan/Aghsu	2	40.5833	48.4	400
467	TA1682	Old collection	Azerbaijan	AZB	Shaki-Zaqatala/Shaki	2	41.2	47.1667	598
468	TA1683	Old collection	Azerbaijan	AZB	Shaki-Zaqatala/Gabala	2	40.9833	47.8333	756
469	TA1684	Old collection	Azerbaijan	AZB	Guba-Khachmaz/Davaci	2	41.2	49.0333	0
470	TA1685	Old collection	Azerbaijan	AZB	Guba-Khachmaz/Davaci	2	41.2	49.0333	460
471	TA1686	Old collection	Azerbaijan	AZB	Daghlig Shirvan/Samaxi	2	40.6333	48.6167	1200
472	TA1687	Old collection	Azerbaijan	AZB	Daghlig Shirvan/Samaxi	2	40.5333	48.9167	1000
473	TA1691	Old collection	Unknown	UNK	Unknown	2	NA	NA	NA
474	TA1693	Old collection	Turkmenistan	TKM	Balkan	2	38.4833	56.3	1200
475	TA1695	Old collection	Unknown	UNK	Unknown	2	NA	NA	NA
476	TA1696	Old collection	Unknown	UNK	Unknown	2	NA	NA	NA
477	TA1703	Old collection	Iran	IRN	Gilan	2	37.1917	50.0833	268
478	TA1713	Old collection	Turkey	TKY	Izmir	2	40.0644	42.8693	NA
479	TA1715	Old collection	Iran	IRN	Gilan	2	38.0135	48.9056	-13
480	TA1718	Old collection	Iran	IRN	Markazi	2	34	50.8167	1818
481	TA2369	Old collection	Russia	RUS	Dagestan	2	42.0692	48.2958	-13
482	TA2375	Old collection	Iran	IRN	Tehran	2	35.898	50.9776	1600
483	TA2376	Old collection	Iran	IRN	Tehran	2	35.6818	52.5146	2010
484	TA2377	Old collection	Iran	IRN	Mazandaran	2	36.6924	53.4756	8
485	TA2378	Old collection	Iran	IRN	Mazandaran	2	36.9576	50.5948	-15
486	TA2446	Old collection	Iran	IRN	Tehran	2	35.898	50.9776	1600
487	TA2449	Old collection	Iran	IRN	Mazandaran	2	36.6924	53.4756	8
488	TA2450	Old collection	Iran	IRN	Mazandaran	2	36.6924	53.4756	8
489	TA2451	Old collection	Iran	IRN	Mazandaran	2	36.7246	53.7424	10
490	TA2452	Old collection	Iran	IRN	Golestan	2	36.8398	54.3428	80
491	TA2453	Old collection	Iran	IRN	Golestan	2	36.9669	54.9567	78
492	TA2454	Old collection	Iran	IRN	Golestan	2	36.9186	54.8849	145
493	TA2455	Old collection	Iran	IRN	Golestan	2	36.9186	54.8849	145
494	TA2456	Old collection	Iran	IRN	Golestan	2	37.0611	55.1237	120
495	TA2457	Old collection	Iran	IRN	Golestan	2	37.3991	55.5002	100
496	TA2459	Old collection	Iran	IRN	Golestan	2	37.3827	55.4871	155
497	TA2460	Old collection	Iran	IRN	Golestan	2	37.3827	55.4871	155
498	TA2461	Old collection	Iran	IRN	Tehran	2	35.7242	52.6637	2025
499	TA2463	Old collection	Iran	IRN	Mazandaran	2	36.6833	53.4217	8
500	TA2464	Old collection	Iran	IRN	Mazandaran	2	36.6949	53.5364	10
501	TA2465	Old collection	Iran	IRN	Mazandaran	2	36.6954	52.6211	-22
502	TA2466	Old collection	Iran	IRN	Mazandaran	2	36.6954	52.6211	-22
503	TA2467	Old collection	Iran	IRN	Mazandaran	2	36.5902	52.0906	-20
504	TA2469	Old collection	Iran	IRN	Mazandaran	2	36.5902	52.0906	-20
505	TA2470	Old collection	Iran	IRN	Mazandaran	2	36.5902	52.0906	-20
506	TA2471	Old collection	Iran	IRN	Mazandaran	2	36.5902	52.0906	-20
507	TA2472	Old collection	Iran	IRN	Mazandaran	2	36.906	50.658	0
508	TA2473	Old collection	Iran	IRN	Gilan	2	37.0585	50.4163	-23
509	TA2474	Old collection	Iran	IRN	Gilan	2	37.1516	50.246	-24
510	TA2475	Old collection	Iran	IRN	Gilan	2	37.1888	50.1512	-20
511	TA2476	Old collection	Iran	IRN	Mazandaran	2	36.8626	50.7836	-22
512	TA2477	Old collection	Iran	IRN	Gilan	2	37.4716	49.4646	-30
513	TA2478	Old collection	Iran	IRN	Gilan	2	37.5174	49.3176	-23
514	TA2479	Old collection	Iran	IRN	Gilan	2	37.5337	49.2709	-25
515	TA2480	Old collection	Iran	IRN	Gilan	2	37.9036	48.9015	15
516	TA2481	Old collection	Iran	IRN	Gilan	2	37.9036	48.9015	15
517	TA2483	Old collection	Iran	IRN	Azarbayjan-e Sharqi (East Azerbaijan)	2	38.4014	48.5925	1100
518	TA2484	Old collection	Iran	IRN	Azarbayjan-e Sharqi (East Azerbaijan)	2	38.25	48.3	1350
519	TA2485	Old collection	Iran	IRN	Azarbayjan-e Sharqi (East Azerbaijan)	2	38.1011	48.127	2240
520	TA2490	Old collection	Iran	IRN	Azarbayjan-e Gharbi (West Azerbaijan)	2	38.3039	44.8022	1550
521	TA2491	Old collection	Iran	IRN	Azarbayjan-e Gharbi (West Azerbaijan)	2	38.5503	44.9588	1140
522	TA2496	Old collection	Iran	IRN	Azarbayjan-e Sharqi (East Azerbaijan)	2	38.0833	46.3	1400
523	TA2497	Old collection	Iran	IRN	Mazandaran	2	36.65	51.42	30
524	TA2498	Old collection	Iran	IRN	Mazandaran	2	36.65	51.42	30
525	TA2499	Old collection	Iran	IRN	Mazandaran	2	36.65	51.42	30
526	TA2524	Old collection	Iran	IRN	Qazvin	2	35.5333	49.183	2250
527	TA2525	Old collection	Iran	IRN	Qazvin	2	35.5333	49.183	2250
528	TA2527	Old collection	Iran	IRN	Mazandaran	2	36.906	50.658	0
529	TA2528	Old collection	Iran	IRN	Mazandaran	2	36.906	50.658	0
530	TA2529	Old collection	Iran	IRN	Mazandaran	2	36.906	50.658	0
531	TA2530	Old collection	Iran	IRN	Mazandaran	2	36.906	50.658	0
532	TA2561	Old collection	Azerbaijan	AZB	Daghlig Shirvan/Samaxi	2	40.5702	48.7477	610
533	TA2562	Old collection	Azerbaijan	AZB	Daghlig Shirvan/Samaxi	2	40.5702	48.7477	610
534	TA2563	Old collection	Azerbaijan	AZB	Daghlig Shirvan/Samaxi	2	40.5702	48.7477	610
535	TA2564	Old collection	Azerbaijan	AZB	Daghlig Shirvan/Samaxi	2	40.5702	48.7477	610
536	TA2565	Old collection	Azerbaijan	AZB	Unknown	2	40.5702	48.7477	NA
537	TA2568	Old collection	Armenia	ARM	Yerevan	2	40.1833	44.5167	1010
538	TA2578	Old collection	Georgia	GEO	Tbilisi	2	41.6856	44.8029	500
539	TA2584	Old collection	Georgia	GEO	Shida Kartli	2	42.0085	44.3642	715
540	TA2585	Old collection	Georgia	GEO	Shida Kartli	2	42.0085	44.3642	715
541	TA10103	Old collection	Georgia	GEO	Unknown	3	41.4746	44.8036	NA
542	TA10104	Old collection	Georgia	GEO	Kakheti	3	41.6455	44.8543	580
543	TA10113	Old collection	Turkmenistan	TKM	Achal (Aschabadsk)	3	37.8098	58.3484	650
544	TA10928	Recent 2012	Georgia	GEO	Tbilisi	3	41.7114	44.8357	646
545	TA10929	Recent 2012	Georgia	GEO	Tbilisi	3	41.7114	44.8357	646
546	TA2576	Old collection	Georgia	GEO	Kvemo Kartli	3	41.525	44.7789	480
547	TA2580	Old collection	Georgia	GEO	Tbilisi	3	41.8151	44.783	425
548	TA2582	Old collection	Georgia	GEO	Tbilisi	3	41.8151	44.783	425
549	TA3429	Old collection	Unknown	UNK	Unknown	3	NA	NA	NA
550	Above	Wheat AM Panel	Unknown	UNK
551	Agate	Wheat AM Panel	Unknown	UNK
552	Akron	Wheat AM Panel	Unknown	UNK
553	Alice	Wheat AM Panel	Unknown	UNK
554	Alliance	Wheat AM Panel	Unknown	UNK
555	Antelope	Wheat AM Panel	Unknown	UNK
556	Anton	Wheat AM Panel	Unknown	UNK
557	Arapahoe	Wheat AM Panel	Unknown	UNK
558	Arlin	Wheat AM Panel	Unknown	UNK
559	Arrow	Wheat AM Panel	Unknown	UNK
560	Bennett	Wheat AM Panel	Unknown	UNK
561	Billings	Wheat AM Panel	Unknown	UNK
562	Bison	Wheat AM Panel	Unknown	UNK
563	Bronze	Wheat AM Panel	Unknown	UNK
564	Buckskin	Wheat AM Panel	Unknown	UNK
565	Burchett	Wheat AM Panel	Unknown	UNK
566	Caprock	Wheat AM Panel	Unknown	UNK
567	Carson	Wheat AM Panel	Unknown	UNK
568	Centerfield	Wheat AM Panel	Unknown	UNK
569	Centura	Wheat AM Panel	Unknown	UNK
570	Cheney	Wheat AM Panel	Unknown	UNK
571	Cheyenne	Wheat AM Panel	Unknown	UNK
572	Colt	Wheat AM Panel	Unknown	UNK
573	Comanche	Wheat AM Panel	Unknown	UNK
574	Cougar	Wheat AM Panel	Unknown	UNK
575	Crimson	Wheat AM Panel	Unknown	UNK
576	Custer	Wheat AM Panel	Unknown	UNK
577	Darrell	Wheat AM Panel	Unknown	UNK
578	Dawn	Wheat AM Panel	Unknown	UNK
579	Deliver	Wheat AM Panel	Unknown	UNK
580	Denali	Wheat AM Panel	Unknown	UNK
581	Duke	Wheat AM Panel	Unknown	UNK
582	Endurance	Wheat AM Panel	Unknown	UNK
583	Expedition	Wheat AM Panel	Unknown	UNK
584	G1878	Wheat AM Panel	Unknown	UNK
585	Gage	Wheat AM Panel	Unknown	UNK
586	Gent	Wheat AM Panel	Unknown	UNK
587	Goodstreak	Wheat AM Panel	Unknown	UNK
588	Hail	Wheat AM Panel	Unknown	UNK
589	Hallam	Wheat AM Panel	Unknown	UNK
590	Halt	Wheat AM Panel	Unknown	UNK
591	Harding	Wheat AM Panel	Unknown	UNK
592	Harry	Wheat AM Panel	Unknown	UNK
593	Hatcher	Wheat AM Panel	Unknown	UNK
594	Hitch	Wheat AM Panel	Unknown	UNK
595	Homestead	Wheat AM Panel	Unknown	UNK
596	Hume	Wheat AM Panel	Unknown	UNK
597	Intrada	Wheat AM Panel	Unknown	UNK
598	JackPot	Wheat AM Panel	Unknown	UNK
599	Jagger	Wheat AM Panel	Unknown	UNK
600	Jerry	Wheat AM Panel	Unknown	UNK
601	Jules	Wheat AM Panel	Unknown	UNK
602	Kiowa	Wheat AM Panel	Unknown	UNK
603	Kirwin	Wheat AM Panel	Unknown	UNK
604	Lancer	Wheat AM Panel	Unknown	UNK
605	Lindon	Wheat AM Panel	Unknown	UNK
606	Lockett	Wheat AM Panel	Unknown	UNK
607	Mace	Wheat AM Panel	Unknown	UNK
608	Millennium	Wheat AM Panel	Unknown	UNK
609	Mit	Wheat AM Panel	Unknown	UNK
610	Nell	Wheat AM Panel	Unknown	UNK
611	Nuplains	Wheat AM Panel	Unknown	UNK
612	Overland	Wheat AM Panel	Unknown	UNK
613	Overley	Wheat AM Panel	Unknown	UNK
614	Parker	Wheat AM Panel	Unknown	UNK
615	Pete	Wheat AM Panel	Unknown	UNK
616	Platte	Wheat AM Panel	Unknown	UNK
617	Pronghorn	Wheat AM Panel	Unknown	UNK
618	Prowers	Wheat AM Panel	Unknown	UNK
619	Rawhide	Wheat AM Panel	Unknown	UNK
620	Redland	Wheat AM Panel	Unknown	UNK
621	Ripper	Wheat AM Panel	Unknown	UNK
622	Rita	Wheat AM Panel	Unknown	UNK
623	Robidoux	Wheat AM Panel	Unknown	UNK
624	Rose	Wheat AM Panel	Unknown	UNK
625	Sage	Wheat AM Panel	Unknown	UNK
626	Sandy	Wheat AM Panel	Unknown	UNK
627	Shawnee	Wheat AM Panel	Unknown	UNK
628	Shocker	Wheat AM Panel	Unknown	UNK
629	Siouxland	Wheat AM Panel	Unknown	UNK
630	Snowmass	Wheat AM Panel	Unknown	UNK
631	Spartan	Wheat AM Panel	Unknown	UNK
632	Stout	Wheat AM Panel	Unknown	UNK
633	TAM107	Wheat AM Panel	Unknown	UNK
634	TAM110	Wheat AM Panel	Unknown	UNK
635	TAM112	Wheat AM Panel	Unknown	UNK
636	TAM113	Wheat AM Panel	Unknown	UNK
637	Tarkio	Wheat AM Panel	Unknown	UNK
638	Tascosa	Wheat AM Panel	Unknown	UNK
639	Tiger	Wheat AM Panel	Unknown	UNK
640	Trison	Wheat AM Panel	Unknown	UNK
641	Turkey	Wheat AM Panel	Unknown	UNK
642	Vista	Wheat AM Panel	Unknown	UNK
643	Vona	Wheat AM Panel	Unknown	UNK
644	Wahoo	Wheat AM Panel	Unknown	UNK
645	Warrior	Wheat AM Panel	Unknown	UNK
646	Wendy	Wheat AM Panel	Unknown	UNK
647	Wesley	Wheat AM Panel	Unknown	UNK
648	Wichita	Wheat AM Panel	Unknown	UNK
649	Windstar	Wheat AM Panel	Unknown	UNK
650	Winoka	Wheat AM Panel	Unknown	UNK
651	Yuma	Wheat AM Panel	Unknown	UNK
652	Yumar	Wheat AM Panel	Unknown	UNK
