# Supplementary material for: Genomic Analysis Confirms Population Structure and Identifies Inter-Lineage Hybrids in Aegilops tauschii
Source: Front Plant Sci. 2019 Jan 25;10:9. doi: 10.3389/fpls.2019.00009 (PMC6357674; doi:10.3389/fpls.2019.00009)
Supplement: Supplementary file 3 [file Table_2.XLSX]

## Sheet: S2_CoreSet
Table S2. List of Ae. tauschii PowerCore and MiniCore accessions with associated metadata.
TA	Core	Origin	Latitude	Longitude	Altitude	Sr	Lr	HF		MC = MiniCore
TA10099	MC	Armenia	40.1397	44.5278	995 m	R	-	-
TA10106	MC	Kyrgyzstan	40.7081	72.8788	743 m	R	-	-
TA10108	MC	Tajikistan	39.2157	70.5265	-	S	-	-
TA10124	MC	Uzbekistan	41.2667	69.2167	433 m	R	-	-
TA10141	MC	PR Chi-	43.5216	82.693	-	S	-	-
TA10144	MC	Syria	35.625	38.7556	370 m	S	-	-
TA10162	MC	Turkmenistan	38	58.1167	610 m	S	-	-
TA10179	MC	Turkmenistan	38.25	56.3333	895 m	R	-	-
TA10210	MC	Uzbekistan	41.2333	71.6518	930 m	S	-	-
TA10212	MC	Uzbekistan	40.3167	71.7672	773 m	S	-	-
TA10330	MC	Kyrgyzstan	42.0575	79.0796	2550 m	S	-	-
TA1578	MC	Unknown	-	-	-	-	R	H
TA1596	MC	Unknown	-	-	-	S	MR	H
TA1605	MC	Unknown	-	-	-	R	R	-
TA1631	MC	Afghanistan	35.7167	64.9	915 m	-	MR	S
TA1651	MC	Iran	36.8467	54.44	130 m	R	R	R
TA1665	MC	Azerbaijan	40.0833	49.4	650 m	R	R	R
TA1666	MC	Azerbaijan	40.0833	49.4	630 m	R	R	R
TA1667	MC	Azerbaijan	40.0833	49.4	630 m	S	R	R
TA1669	MC	Azerbaijan	40.0833	49.4	780 m	-	R	R
TA1694	MC	Turkmenistan	38.4833	56.3	450 m	S	R	S
TA1707	MC	Sweden	-	-	-	H	R	R
TA2374	MC	Pakistan	30.1321	66.9617	1690 m	S	S	S
TA2376	MC	Iran	35.6818	52.5146	2010 m	R	S	S
TA2378	MC	Iran	36.9576	50.5948	-15 m	R	R	S
TA2395	MC	Afghanistan	34.0197	68.7291	2075 m	-	S	S
TA2413	MC	Afghanistan	36.1761	68.3775	1040 m	S	S	S
TA2431	MC	Afghanistan	35.9068	64.6971	860 m	S	S	R
TA2435	MC	Afghanistan	35.7844	64.3716	1100 m	-	S	R
TA2448	MC	Iran	35.898	50.9776	1600 m	-	S	R
TA2458	MC	Iran	37.3991	55.5002	100 m	-	R	R
TA2468	MC	Iran	36.5902	52.0906	-20 m	H	R	R
TA2474	MC	Iran	37.1516	50.246	-24 m	R	S	R
TA2485	MC	Iran	38.1011	48.127	2240 m	R	S	S
TA2488	MC	Iran	37.0848	45.4793	1270 m	S	S	R
TA2508	MC	Turkey	38.9573	43.6597	1780 m	S	S	R
TA2514	MC	Iran	38.9028	45.033	1100 m	S	S	R
TA2536	MC	Afghanistan	36.4699	69.8669	1300 m	S	S	H
TA2545	MC	Afghanistan	36.9551	71.0129	1460 m	S	S	R
TA2586	MC	Georgia	42.0172	44.1417	630 m	R	S	H
TA2493	-	Iran	38.459	45.6084	1170 m	S	S	R
TA2453	-	Iran	36.9669	54.9567	78 m	-	S	R
TA2521	-	Iran	37.0278	48.0041	1235 m	S	S	S
TA1625	-	Azerbaijan	40.5702	48.7477	-	-	S	H
TA10181	-	Turkmenistan	40.0333	52.9667	26 m	S	-	-
TA2539	-	Afghanistan	37.07	71.142	2060 m	S	S	S
TA10945	-	Azerbaijan	40.5862	48.4158	370 m	-	-	-
TA10960	-	Azerbaijan	39.5438	45.2602	2018 m	-	-	-
TA1626	-	Turkmenistan	38.4167	57.4	1200 m	-	S	H
TA1670	-	Azerbaijan	40.9833	47.8333	600 m	H	R	R
TA1699	-	Russia	42.1333	47.1	1850 m	S	S	H
TA10192	-	Uzbekistan	39.9667	37.5	733 m	S	-	-
TA2480	-	Iran	37.9036	48.9015	15 m	R	S	H
TA10932	-	Azerbaijan	40.5001	48.9802	631 m	-	-	-
TA10317	-	Tajikistan	38.5833	68.8	800 m	H	-	-
TA2512	-	Iran	39.2482	44.8833	900 m	S	S	H
TA10131	-	Armenia	39.5079	46.3386	1800 m	S	-	-
TA2565	-	Azerbaijan	40.5702	48.7477	-	-	S	S
TA10136	-	PR Chi-	43.8147	82.4689	730 m	S	-	-
TA2530	-	Iran	36.906	50.658	0 m	S	R	H
TA2462	-	Iran	36.6051	53.2246	43 m	-	R	-
TA10142	-	Syria	36.7189	40.1475	340 m	R	-	-
TA10310	-	Tajikistan	38.5667	69.3167	1600 m	H	-	-
TA2549	-	Afghanistan	37.0305	71.0122	1750 m	S	S	H
TA2475	-	Iran	37.1888	50.1512	-20 m	-	S	R
TA2559	-	Afghanistan	36.3903	68.898	480 m	S	S	H
TA1612	-	Former USSR	-	-	-	S	-	-
TA2466	-	Iran	36.6954	52.6211	-22 m	-	S	R
TA2540	-	Afghanistan	37.07	71.142	2060 m	S	S	S
TA10167	-	Turkmenistan	38.3417	56.2974	710 m	S	-	-
TA2575	-	Armenia	40.335	44.2648	1450 m	S	S	S
TA2497	-	Iran	36.65	51.42	30 m	-	S	H
TA2455	-	Iran	36.9186	54.8849	145 m	S	S	R
TA2479	-	Iran	37.5337	49.2709	-25 m	S	S	S
TA2510	-	Turkey	38.985	43.558	1740 m	-	S	R
TA10169	-	Turkmenistan	38.2	56.2	470 m	S	-	-
TA2427	-	Afghanistan	35.9184	64.7672	850 m	S	S	H
TA1655	-	Afghanistan	36.3903	68.898	518 m	-	S	S
TA10198	-	Uzbekistan	40.8833	71.1	559 m	S	-	-
TA2464	-	Iran	36.6949	53.5364	10 m	-	S	R
TA10127	-	Georgia	41.8386	44.7339	470 m	S	-	-
TA2419	-	Afghanistan	36.1889	68.3068	1330 m	S	S	R
TA10182	-	Turkmenistan	37.85	58.3633	280 m	S	-	-
TA10145	-	Syria	35.6256	38.7586	-	S	-	-
TA10193	-	Uzbekistan	39.5	67.3833	1228 m	S	-	-
TA2532	-	Afghanistan	34.5508	69.0345	2020 m	-	S	-
TA10918	-	Georgia	41.6099	44.8017	521 m	-	-	-
TA10303	-	Tajikistan	38.5256	68.5472	450 m	S	-	-
TA2465	-	Iran	36.6954	52.6211	-22 m	-	S	R
TA2469	-	Iran	36.5902	52.0906	-20 m	-	S	R
TA1657	-	Azerbaijan	40.75	48.7333	410 m	S	MR	S
TA10104	-	Georgia	41.6455	44.8543	580 m	S	-	-
TA10296	-	Tajikistan	38.5256	68.5472	450 m	-	-	-
TA10921	-	Georgia	41.6099	44.8017	521 m	-	-	-
TA1679	-	Azerbaijan	40.6333	48.6167	780 m	-	S	S
TA10185	-	Turkmenistan	38.5	56.8333	1463 m	S	-	-
TA2407	-	Afghanistan	36.1379	68.5135	675 m	S	S	S
TA1641	-	Iran	36.6111	53.2312	33 m	S	R	S
TA10188	-	Turkmenistan	38.4881	56.7042	1073 m	R	-	-
TA2382	-	Pakistan	30.2069	66.9672	1645 m	H	S	H
TA2377	-	Iran	36.6924	53.4756	8 m	H	S	R
TA1668	-	Azerbaijan	40.0833	49.4	800 m	R	S	R
TA2449	-	Iran	36.6924	53.4756	8 m	-	R	R
TA2372	-	Afghanistan	35.7242	63.4845	-	-	S	H
TA2515	-	Iran	38.9028	45.033	1100 m	S	S	H
TA2426	-	Afghanistan	35.9184	64.7672	850 m	S	S	H
TA2461	-	Iran	35.7242	52.6637	2025 m	S	S	S
